# Supplementary material for: Molecular Mapping of Biofortification Traits in Bread Wheat (Triticum aestivum L.) Using a High-Density SNP Based Linkage Map
Source: MDPI journal article supplement (doi:10.3390/genes14010221), 2023-01-14
Supplement: s1 [file s1]

| Trait | Environment | Parents |       | 10 Superior RILs |         |         |        |         |         |        |         |         |         |
|-------|-------------|---------|-------|------------------|---------|---------|--------|---------|---------|--------|---------|---------|---------|
| GPC   | 2017-18     | P1      | P2    | RIL-68           | RIL-54  | RIL-124 | RIL-30 | RIL-164 | RIL-166 | RIL-36 | RIL-47  | RIL-181 | RIL-65  |
|       |             | 13.15   | 11.62 | 18.38            | 17.97   | 18.13   | 16.55  | 16.14   | 16.90   | 16.38  | 16.18   | 16.34   | 16.14   |
|       |             | 14.35   | 10.69 | 17.73            | 16.46   | 16.15   | 16.29  | 16.55   | 15.75   | 15.66  | 15.75   | 15.58   | 15.75   |
|       |             | 13.75   | 11.15 | 18.05            | 17.21   | 17.14   | 16.42  | 16.34   | 16.33   | 16.02  | 15.97   | 15.96   | 15.94   |
|       | Pooled      |         |       |                  |         |         |        |         |         |        |         |         |         |
| GFeC  | 2017-18     | P1      | P2    | RIL-164          | RIL-30  | RIL-119 | RIL-65 | RIL-24  | RIL-27  | RIL-54 | RIL-174 | RIL-175 | RIL-179 |
|       |             | 45.05   | 35.10 | 52.35            | 51.48   | 49.90   | 49.25  | 49.85   | 45.45   | 48.10  | 47.00   | 47.95   | 46.20   |
|       |             | 43.90   | 35.95 | 54.30            | 53.90   | 55.30   | 54.10  | 48.80   | 51.60   | 48.25  | 49.25   | 47.70   | 48.85   |
|       |             | 44.48   | 35.53 | 53.33            | 52.69   | 52.60   | 51.68  | 49.33   | 48.53   | 48.18  | 48.13   | 47.83   | 47.53   |
|       | Pooled      |         |       |                  |         |         |        |         |         |        |         |         |         |
| GZnC  | 2017-18     | P1      | P2    | RIL-68           | RIL-112 | RIL-181 | RIL-24 | RIL-47  | RIL-21  | RIL-65 | RIL-22  | RIL-166 | RIL-178 |
|       |             | 56.30   | 46.95 | 59.65            | 64.05   | 60.25   | 62.75  | 56.75   | 72.35   | 59.30  | 61.45   | 58.00   | 53.64   |
|       |             | 57.00   | 47.95 | 77.50            | 68.40   | 70.05   | 65.45  | 69.70   | 52.85   | 65.55  | 63.15   | 66.45   | 69.70   |
|       |             | 56.65   | 47.45 | 68.58            | 66.23   | 65.15   | 64.10  | 63.23   | 62.60   | 62.43  | 62.30   | 62.23   | 61.67   |
|       | Pooled      |         |       |                  |         |         |        |         |         |        |         |         |         |
| TKW   | 2017-18     | P1      | P2    | RIL-30           | RIL-20  | RIL-64  | RIL-14 | RIL-47  | RIL-176 | RIL-75 | RIL-100 | RIL-84  | RIL-24  |
|       |             | 37.80   | 39.10 | 50.20            | 51.35   | 49.75   | 51.20  | 51.20   | 49.20   | 45.75  | 47.58   | 48.13   | 50.08   |
|       |             | 42.13   | 41.20 | 53.17            | 51.05   | 52.01   | 48.94  | 47.96   | 48.21   | 51.41  | 49.06   | 48.24   | 46.28   |
|       |             | 39.97   | 40.15 | 51.69            | 51.20   | 50.88   | 50.07  | 49.58   | 48.71   | 48.58  | 48.32   | 48.18   | 48.18   |
|       | Pooled      |         |       |                  |         |         |        |         |         |        |         |         |         |

S1: superior recombinant lines along with parental values of all the studied traits
